# Supplementary material for: Clustering of human prion protein and α-synuclein oligomers requires the prion protein N-terminus
Source: PubMed Central journal article supplement (PMC7347944; doi:10.1038/s42003-020-1085-z), 2020-07-09
Supplement: 42003_2020_1085_MOESM1_ESM.pdf [file 42003_2020_1085_MOESM1_ESM.pdf]

## **Supplementary Information**

### **Clustering of human prion protein and $\alpha$ -synuclein oligomers requires the prion protein N-terminus**

Nadine S. Rösener<sup>1,2</sup>, Lothar Gremer<sup>1,2</sup>, Michael M. Würdehoff<sup>1</sup>, Tatsiana Kupreichyk<sup>1,2</sup>,  
Manuel Eitzkorn<sup>1,2</sup>, Philipp Neudecker<sup>1,2</sup>, and Wolfgang Hoyer<sup>1,2,\*</sup>

<sup>1</sup>Institut für Physikalische Biologie, Heinrich-Heine-Universität Düsseldorf, 40204  
Düsseldorf, Germany

<sup>2</sup>Institute of Biological Information Processing (IBI-7) and JuStruct: Jülich Center for  
Structural Biology, Forschungszentrum Jülich, 52425 Jülich, Germany

Correspondence and requests for materials should be addressed to W.H. (email:  
wolfgang.hoyer@hhu.de)

## Supplementary Figures

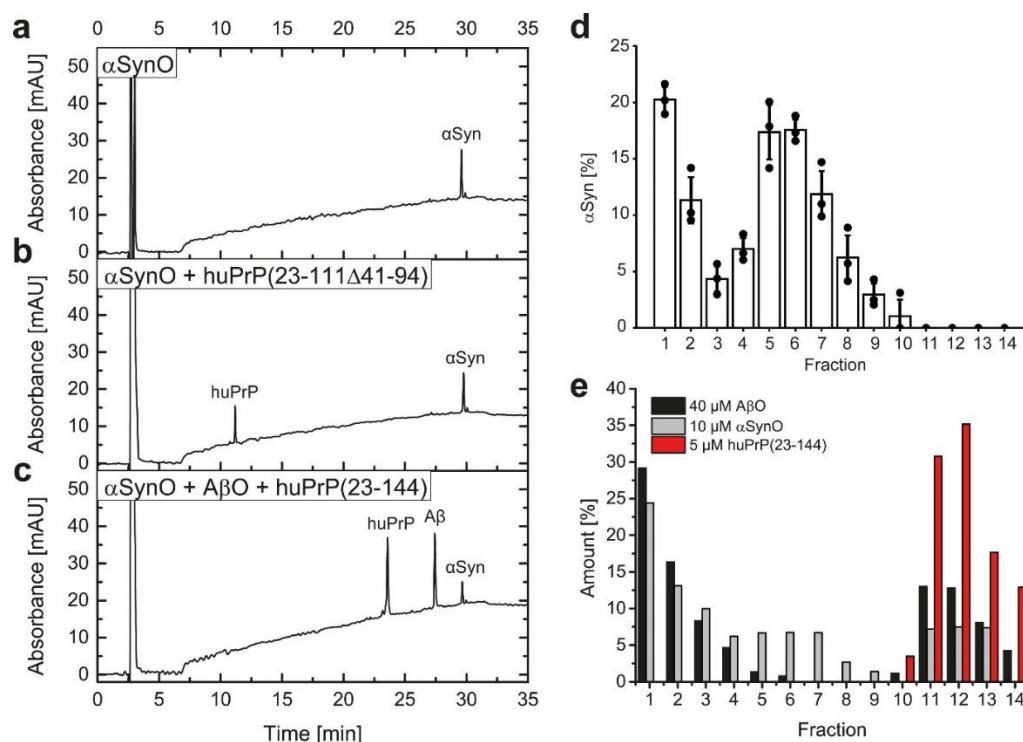

**Supplementary Fig. 1** Quantification of protein contents of DGC fractions by RP-HPLC. The individual DGC fractions were analyzed to determine the  $\alpha$ Syn, A $\beta$ , and huPrP contents. **a** Example chromatogram of one DGC fraction of an  $\alpha$ SynO sample. **b** Chromatogram of a DGC HMW fraction showing that huPrP(23-111 $\Delta$ 41-94) co-migrates with  $\alpha$ Syn. **c** Example chromatogram of one DGC HMW fraction of a mixture of  $\alpha$ SynO, A $\beta$ O, and huPrP(23-144). **d** Determination of the monomer content in  $\alpha$ SynO samples. Plot of the distribution of  $\alpha$ Syn over the 14 fractions after DGC of  $\alpha$ SynO samples. The bars represent mean and standard deviation of three independent  $\alpha$ SynO preparations. The residual monomer content (fractions 1-3) accounts for  $35.9 \pm 3.2$  % of total  $\alpha$ Syn (error represents SD). **e** Plot of the distribution of  $\alpha$ Syn, A $\beta$ , and huPrP(23-144) over the 14 fractions after DGC of a sample containing 10  $\mu$ M  $\alpha$ SynO, 40  $\mu$ M A $\beta$ O, and 5  $\mu$ M huPrP(23-144).

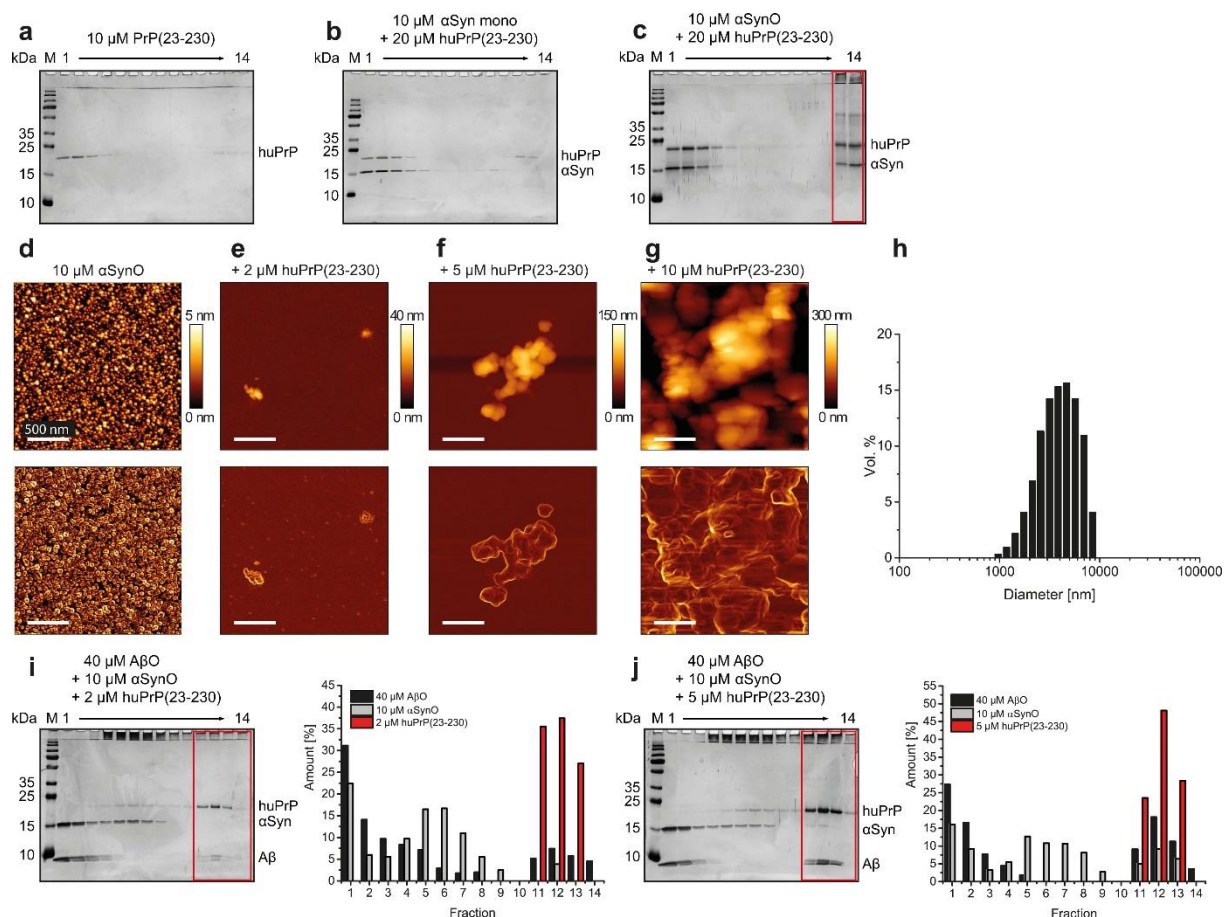

**Supplementary Fig. 2** Characterization of cluster formation of  $\alpha\text{SynO}$  and huPrP(23-230) and co-cluster formation with  $\text{A}\beta\text{O}$ . **a-c** Silver stained Tris/Glycine SDS-PAGE gels show the distributions of the applied proteins within the DGC gradients from left to right corresponding to the fractions from top to bottom of each gradient. Lanes corresponding to HMW heteroassemblies are marked by red boxes. **d-g** AFM of  $\alpha\text{SynO}$  **d** without and **e-g** with increasing concentrations of huPrP(23-230). AFM data are shown both as raw height images (top panels) and after edge detection using the Sobel operator for visualization of structural details (bottom panels). AFM scale bars represent 500 nm. **h** DLS measurement of heteroassemblies generated from 10  $\mu\text{M}$   $\alpha\text{SynO}$  and 20  $\mu\text{M}$  huPrP(23-230) and isolated by sucrose DGC. **i, j**  $\alpha\text{SynO}$  and  $\text{A}\beta\text{O}$  co-cluster with huPrP(23-230). Silver stained SDS-PAGE gels and quantitative analysis by RP-HPLC after DGC of mixtures of 40  $\mu\text{M}$   $\text{A}\beta\text{O}$  and 10  $\mu\text{M}$   $\alpha\text{SynO}$  containing either **i** 2  $\mu\text{M}$  or **j** 5  $\mu\text{M}$  huPrP(23-230). Co-clustering of all proteins as heteroassemblies is detectable in DGC fractions 11-14 (red boxes).

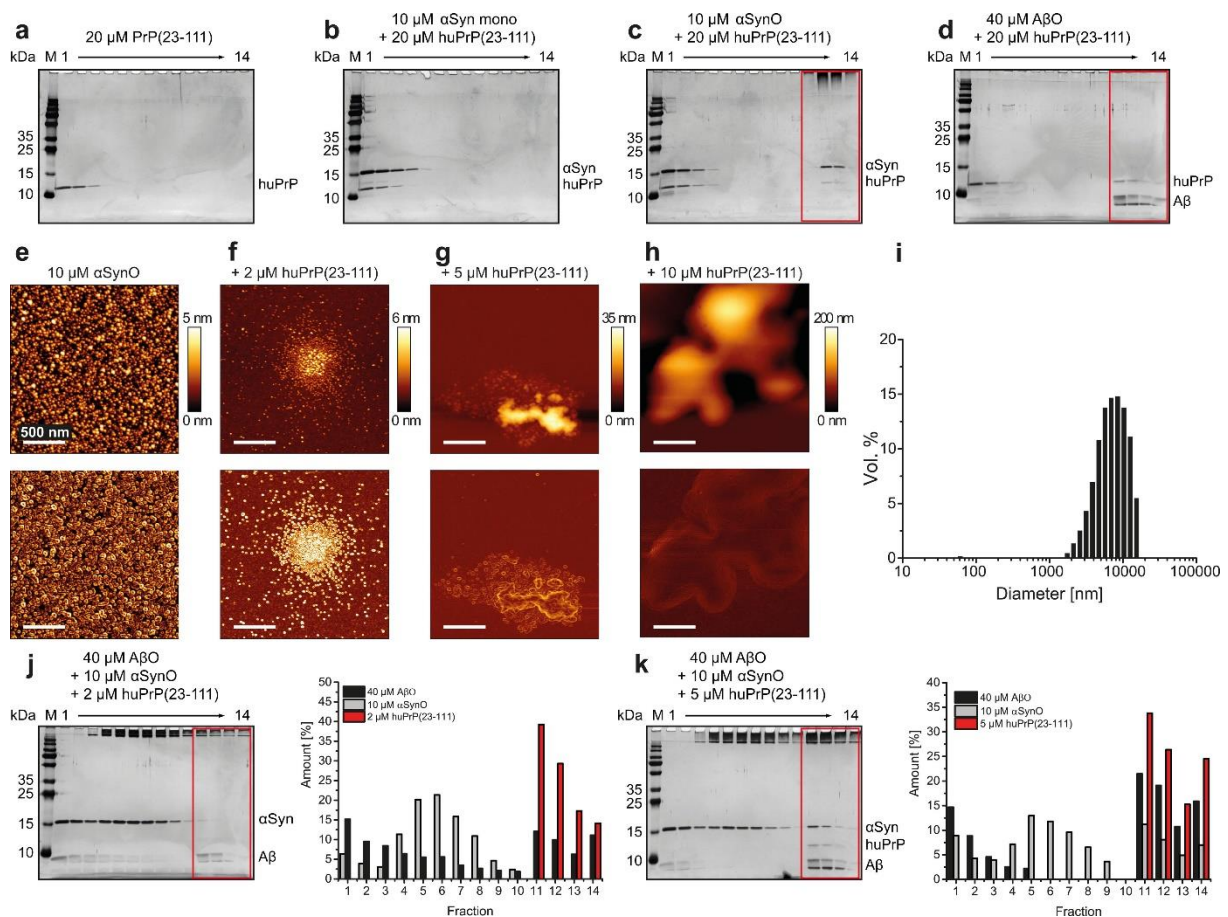

**Supplementary Fig. 3** Characterization of cluster formation of  $\alpha$ SynO and huPrP(23-111) and co-cluster formation with A $\beta$ . **a-d** Silver stained Tris/Glycine SDS-PAGE gels show the distributions of the applied proteins within the DGC gradients from left to right corresponding to the fractions from top to bottom of each gradient. Lanes corresponding to HMW heteroassemblies are marked by red boxes. **e-h** AFM of  $\alpha$ SynO **e** without and **f-h** with increasing concentrations of huPrP(23-111). AFM data are shown both as raw height images (top panels) and after edge detection using the Sobel operator for visualization of structural details (bottom panels). AFM scale bars represent 500 nm. **i** DLS measurement of heteroassemblies generated from 10  $\mu$ M  $\alpha$ SynO and 20  $\mu$ M huPrP(23-111) and isolated by sucrose DGC. **j, k**  $\alpha$ SynO and A $\beta$ O co-cluster with huPrP(23-111). Silver stained SDS-PAGE gels and quantitative analysis by RP-HPLC after DGC of mixtures of 40  $\mu$ M A $\beta$ O and 10  $\mu$ M  $\alpha$ SynO containing either **j** 2  $\mu$ M or **k** 5  $\mu$ M huPrP(23-111). Co-clustering of all proteins as heteroassemblies is detectable in DGC fractions 11-14 (red boxes).

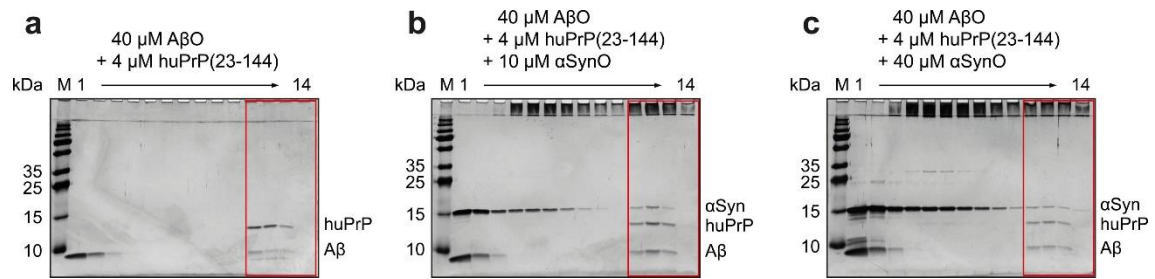

**Supplementary Fig. 4**  $\alpha$ SynO and A $\beta$ O compete for cluster formation with huPrP(23-144). Silver stained SDS-PAGE gels after DGC of a mixture of 4  $\mu\text{M}$  huPrP(23-144) and 40  $\mu\text{M}$  A $\beta$ O containing either **a** no, **b** 10  $\mu\text{M}$ , or **c** 40  $\mu\text{M}$   $\alpha$ SynO. The quantitative analysis by RP-HPLC of the distribution of assemblies into oligomer fractions (4-9) vs. HMW fractions (10-14) is shown in Fig. 7f.

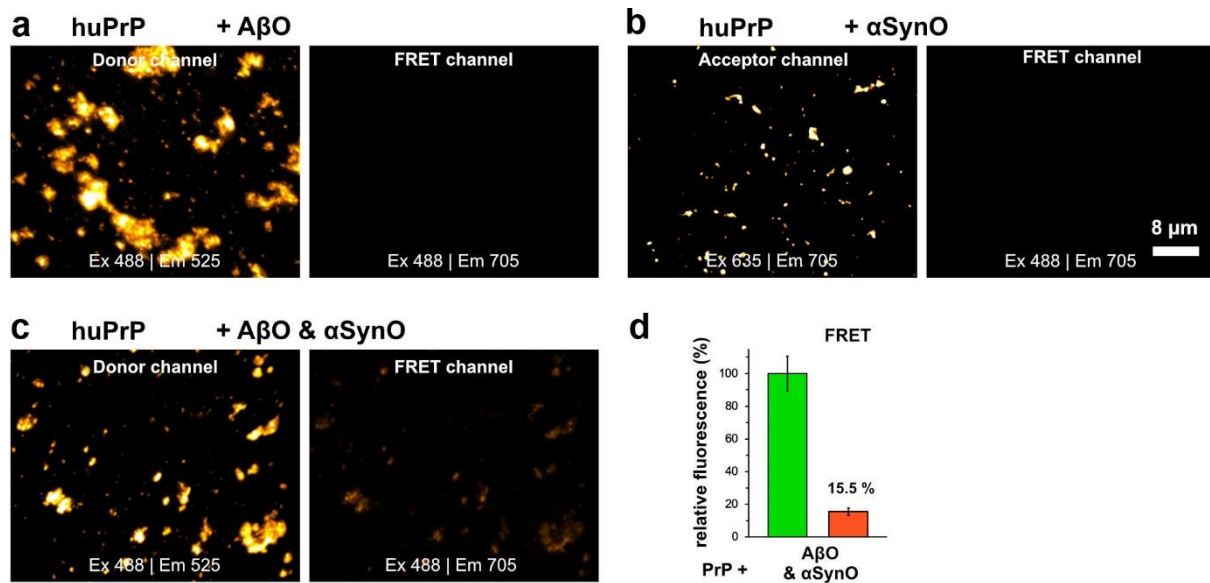

**Supplementary Fig. 5** FRET between AβO and αSynO in mixed condensates with huPrP(23-144) observed by TIRFM. The images are the same as those presented in Fig. 7. AβO was 10 % FITC-labeled, αSynO was 10 % Atto633-labeled, huPrP(23-144) was not fluorescently labeled. **a** 2 μM huPrP(23-144) and 40 μM AβO, excited at 488 nm and detected at 525 nm (donor channel, left) and the corresponding image with excitation at 488 nm and detection at 705 nm (FRET channel, right). **b** 2 μM huPrP(23-144) and 10 μM αSynO, excited at 635 nm and detected at 705 nm (acceptor channel, left) and the corresponding image with excitation at 488 nm and detection at 705 nm (FRET channel, right). **c** Mixture of 2 μM huPrP(23-144), 40 μM AβO and 10 μM αSynO, excited at 488 nm and detected at 525 nm (donor channel, left) and the corresponding image with excitation at 488 nm and detection at 705 nm (FRET channel, right). Only the mixed condensates **c** show a fluorescence signal in the FRET channel. **d** Relative fluorescence intensity in the FRET channel of mixed huPrP, AβO and αSynO condensates (red bar) compared to the donor channel (set to 100 %, green bar). Background fluorescence of the controls (huPrP with AβO and αSynO alone) was subtracted. Thirty two 40 μm x 50 μm areas as shown in **c** were evaluated for the bar chart. The mean of their integrated density (=sum of pixel intensities) was calculated with ImageJ (developed by Wayne Rasband, National Institutes of Health, Bethesda, MD). Error bars represent SD among the 32 evaluated areas. -- Scale bar for all images: 8 μm.

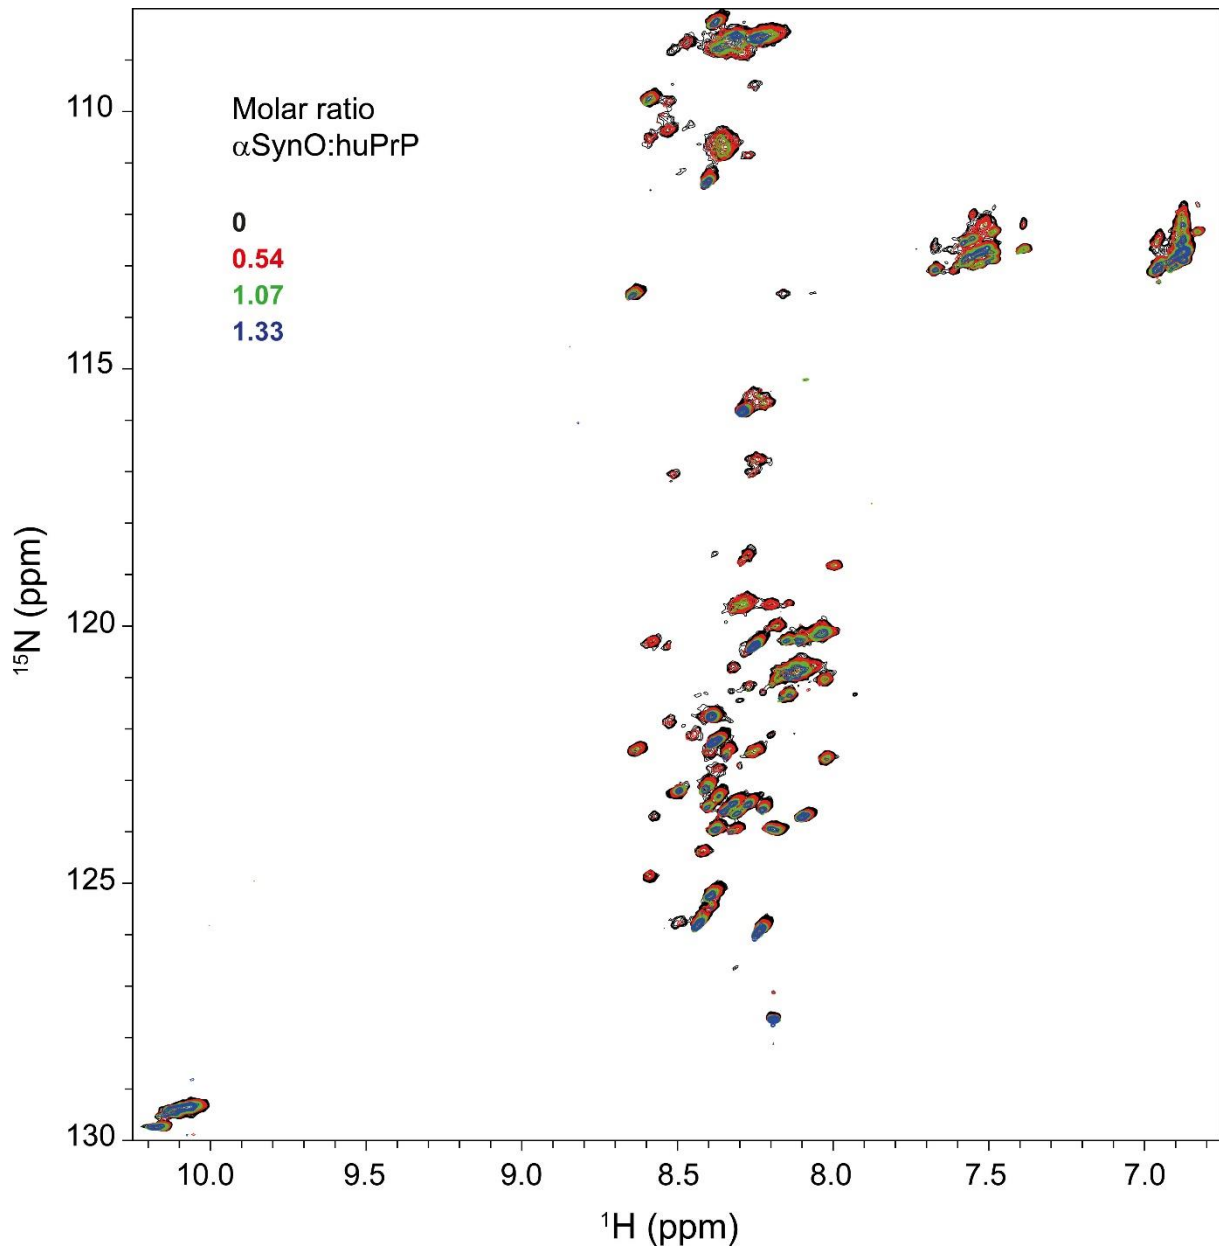

**Supplementary Fig. 6** [ $^1\text{H}$ ,  $^{15}\text{N}$ ] HSQC NMR spectra of [ $\text{U}-^{13}\text{C}$ ,  $^{15}\text{N}$ ]-labeled huPrP(23-144) before (black) and after addition of unlabeled  $\alpha\text{SynO}$  to the indicated molar ratio.  $\alpha\text{SynO}$  was gradually added to a sample of [ $\text{U}-^{13}\text{C}$ ,  $^{15}\text{N}$ ] huPrP(23-144) (initial concentration 60  $\mu\text{M}$ ) in 30 mM Tris-HCl, pH 7.4, 10 % (v/v)  $\text{D}_2\text{O}$ . This figure is an enlarged copy of Fig. 3a.
